# Supplementary material for: Do eco-friendly binders affect the electrochemical performance of MOF@CNT anodes in lithium-ion batteries?
Source: Royal Society of Chemistry journal article supplement (doi:10.1039/d2nj02560d), 2022-01-01
Supplement: d2nj02560d1.pdf [file d2nj02560d1.pdf]

## “Do eco-friendly binders affect electrochemical performance of MOF@CNT anodes in Lithium-ion batteries?”

Soheila Javadian<sup>\*a</sup>, Fatemeh Heidari Keleshteri<sup>a</sup>, Zohre Parviz<sup>a</sup> and Hussein Gharibi<sup>a</sup>

Correspondence to: S. Javadian; E-mail: [javadian\\_s@modares.ac.ir](mailto:javadian_s@modares.ac.ir), [javadians@yahoo.com](mailto:javadians@yahoo.com);

Fax: +98-21-82883455; Tel: +98-21-82883477

<sup>a</sup>Department of Physical Chemistry, Faculty of Basic Science, Tarbiat Modares University,

New Journal of Chemistry

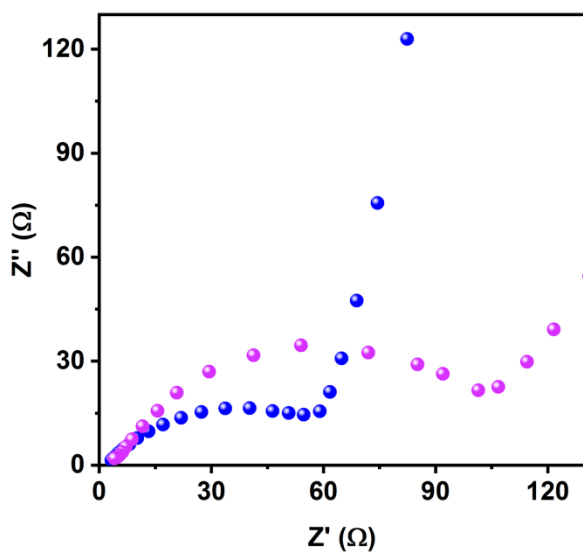

Figure S1. Nyquist plot in high frequency region before cycling

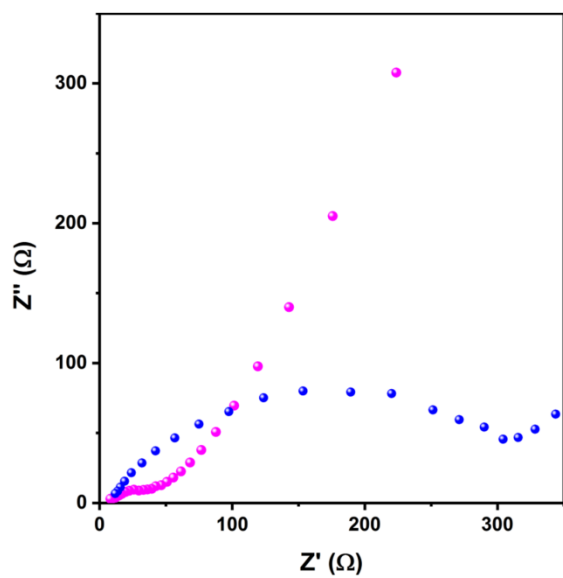

Figure S2. Nyquist plot in high frequency region after cycling

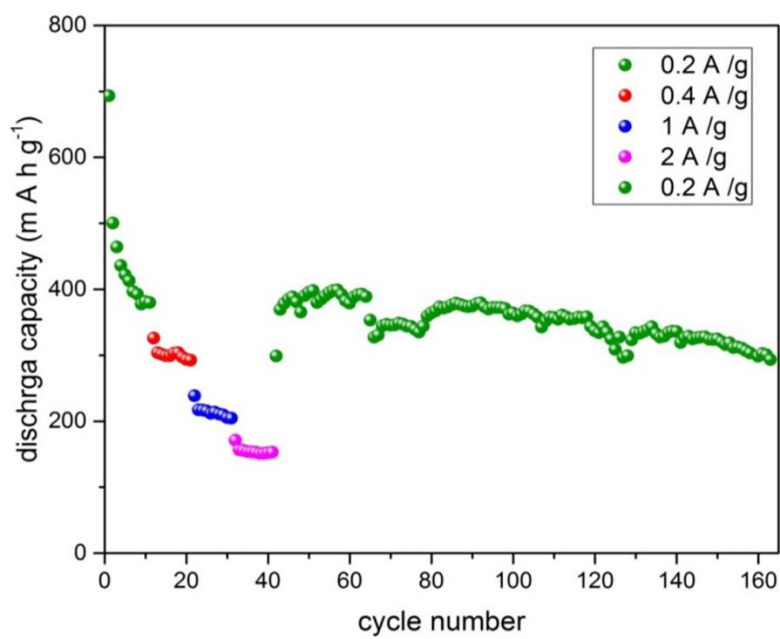

Figure S3. Rateability of TMU-10@CNT with CMC binder
